# Supplementary material
Source: publisher figshare collection journal article supplement (https://gsapubs.figshare.com/ndownloader/files/34781221)
Supplement: Supplementary file 1 [file 34781221]

## SUPPLEMENTAL MATERIAL

### Methods

Apatite (U-Th)/He (AHe) and apatite fission track (AFT) thermochronological systems have partial retention temperature of 40-80 °C (Farley, 2000; Wolf et al., 1998) and annealing temperature of 60-110 °C (Ketcham et al., 2007), respectively. Thus, these two methods would provide constraints on exhumation histories of the upper ~2 to 5-km crust. Both AHe and AFT analyses were conducted in the thermochronology lab at the State Key Laboratory of Earthquake Dynamics, Institute of Geology, China Earthquake Administration. Apatite grains were extracted from samples following standard crushing, heavy liquid and magnetic separation procedures.

**Apatite (U-Th)/He Method** Apatite crystals were carefully hand-picked on the basis of morphology (euhedral), size (usually >70-80 µm), and optical clarity (inclusion-free) using a high-power stereo-zoom microscope. Each grain was loaded into a Pt tube and analyzed for He on an Australian Scientific Instruments Alphachron (U-Th)/He system. He was extracted by heating using a Nd-YAG laser heating (8A current) for 5 min, followed by at least one more extraction to ensure complete degassing. The extracted <sup>4</sup>He was spiked with <sup>3</sup>He and measured on a quadrupole mass spectrometer. Then, the degassed grains were dissolved in HNO<sub>3</sub> and the U and Th contents were measured on an Agilent 7900 inductively coupled plasma-mass spectrometry (ICP-MS). Shards of Durango apatite were analyzed with the samples as age standards. Apparent He age of each grain was calculated iteratively based on the equation  $^4\text{He} = 8 \cdot (^{238}\text{U}) \cdot [\exp(\lambda_{238t}) - 1] + 7 \cdot (^{235}\text{U}) \cdot [\exp(\lambda_{235t}) - 1] + 6 \cdot (^{232}\text{Th}) \cdot [\exp(\lambda_{232t}) - 1]$  and corrected for  $\alpha$ -ejection (Ketcham et al., 2011). Mean age was determined using usually 5-7 aliquots for each sample.

**LA-ICP-MS Fission Track Method** Fission-track chronometry is one of the best established low-temperature thermochronometry, which has been widely used to understand exhumation of the shallow crust related to tectonic or climate process (Hurford and Green, 1982; Gleadow et al., 2002). The conventional external detector method (EDM) has been well established to circumvent a serious of uncertainties, including mineral chemistry, absolute value of decay constant, and the efficiency of irradiation (Hasebe et al., 2004). However, due to the environmental and political pressures, the only available reactor in China has been closed to the public and an international delivery was blocked during the coronavirus pandemic. We used laser ablation-inductively coupled plasma mass spectrometry (LA-ICP-MS) method for uranium measurement for FT analysis. To assess the reliability of the LA-ICP-MS fission track method in our laboratory, Pang et al. (2017) analyzed 54 Durango apatite fragments and 38 Fish Canyon Tuff (FCT) apatite fragments. The central ages range from  $31.1 \pm 1.2$  Ma to  $34.1 \pm 1.2$  Ma for Durango apatites, and from  $26.0 \pm 1.0$  Ma to  $29.3 \pm 2.0$  Ma for FCT apatites, which are well consistent with published ages (Mcdowell et al., 2005; Gleadow et al., 2015). The apatite fission-track ages from both the Quyang and Xingtai transects vary systematically with elevation, lending confidence of the reliability of our dating results. Apatite grains were mounted on epoxy slides with araldite epoxy, then etched in 5.5 M HNO<sub>3</sub> at 21 °C for 20 s. U content was determined using a Resolution M50 ArF excimer laser at a wavelength of 193 nm and an Agilent 7900 ICP-MS. A 22 µm square beam was used for all analyses. All the samples passed the chi-

square test. The detailed analytical procedures for sample preparing and analysis using LA-ICP-MS fission-track method can be found in [Pang et al. \(2017\)](#).

**Inverse Thermal History Modeling** To further investigate the thermal evolution of samples from the three transects, thermal history modeling was performed using QTQt (v5.4.0) software based on the Bayesian transdimensional Markov chain Monte Carlo (MCMC) inversion scheme ([Gallagher, 2012](#)). The samples from each transect were treated as a vertical profile. Input data for inversions included AFT and AHe ages, AFT track-length distribution,  $D_{par}$  value, and grain size data. Annealing algorithm for apatite fission track ([Ketcham et al., 2007](#)) and no radiation damage models for apatite helium diffusion ([Farley, 2000](#)) were used for thermal history modeling. Thermal history covers a broad time range from the late Mesozoic to the present and a temperature range over the sensitive regions of the apatite fission-track thermochronometer. Assuming that the paleogeothermal gradient is similar to the present value ( $25 \pm 15$  °C/km), a broad reasonable temperature offset between the uppermost and lowermost was applied to the modeling protocol with sufficient search freedom. The present surface temperature of  $15 \pm 15$  °C was applied for all samples. No other constraints were imposed during the modeling. More than 250,000 iterations for both burn-in and post-burn-in process were used to calculate the average model. AHe ages calculations were tested using no radiation damage and two radiation damage models ([Flowers et al., 2009](#); [Gautheron et al., 2009](#)). No significant differences were observed among these three models.

The agreement between the observed and predicted values is important for assessing the reliability of the inverse thermal histories. Generally, the observed and predicted values of the AHe ages are well consistent for most of the samples from the three transects ([Figures S7, S8, and S9](#)). For the Taibai transect, the expected thermal histories inferred with Flowers' radiation damage model ([Flowers et al., 2009](#)) result in two pulsed rapid cooling. The predictions are in accordance with the observations ([Figure S7](#)). The first rapid cooling occurred at ~50 Ma and the second one occurred at ~25 Ma. The inferred thermal history is consistent with the direct interpretations on the age-elevation relationship, which indicates relatively slow cooling prior to the Oligocene and a phase of rapid cooling commenced at  $26.8 \pm 1.5$  Ma followed by slow cooling. For the Quyang transect, the expected thermal histories indicate two phases of rapid cooling. One occurred at ~50-40 Ma and the other at ~22 Ma. The second phase of cooling is more significant. The AHe ages and apatite fission-track lengths can be reasonably well predicted, while few fission-track ages (QY19-6 and QY19-4) are slightly older than the predicted values. The expected thermal histories of the Xingtai transect is similar to that of the Quyang transect and also show two phases of rapid cooling. The first phase of rapid cooling occurred at ~50-40 Ma following a period of slow cooling since the late Mesozoic. The second phase of rapid cooling occurred at ~28-22 Ma. The AHe ages and fission-track lengths are overall well predicted, but the fission-track ages, particularly for the lower six samples are slightly younger than the predicted values.

### **Additional Interpretation of Anomalously Old AHe Data from the Xingtai Transect**

Apatite (U-Th)/He dating method with low closure temperature (~70 °C) has been applied into a wide range of topics ([Reiners and Brandon, 2006](#)). A key issue in applying this

thermochronometer is the uncertainty and reproducibility in dating results (Green et al., 2006; Gautheron et al., 2009; Reiners et al., 2017). It is quite common that the ages of (U-Th)/He aliquots from the same rock sample spread over a wide range. Many factors are reported to be responsible for the uncertainty and non-reproducibility, such as laboratory procedure, effective uranium (eU) distribution, grain size, and radiation damage (Reiners et al., 2017). However, even considering these factors, the dispersion of (U-Th)/He dating results is large and difficult to understand. In some cases, the (U-Th)/He ages are even significantly older than the fission-track ages from the same sample (Hendriks and Redfield, 2005; Green et al., 2006).

For the Xingtai transect, the distribution of AHe ages shows a correlation with lithology (Figure S6). The ages of the upper three samples (XT19-1, XT19-2, and XT19-3) collected from sandstone generally vary with elevation. Sample XT19-3 has nine aliquots with AHe ages that are generally concentrated, ranging from  $23.0 \pm 0.4$  Ma to  $29.0 \pm 1.1$  Ma. Consistently, the lowest sample XT19-12 collected from granodiorite has five aliquots with AHe ages ranging from  $21.2 \pm 0.8$  Ma to  $33.7 \pm 0.7$  Ma and a mean value of  $26.6 \pm 4.9$  Ma. In contrast, the intermediate six samples (from XT19-5 to XT19-10) are collected from the Archean gneiss, which have AHe ages distributed over a wide range from  $25.6 \pm 0.9$  Ma to  $63.8 \pm 1.3$  Ma. Particularly, most of the AHe ages of the (U-Th)/He aliquots are much older than the fission-track ages from the same sample. If we excluded the AHe ages older than the fission-track ages from the same sample, the AHe ages of two grains from the Archean gneiss are consistent with that from sample XT19-3 at the higher elevation and sample XT19-12 at the lower. There is no correlation between the eU concentration and the AHe age (Figure S4), indicating that radiation damage may be not a major factor responsible for the anomalously older AHe ages. No age-size correlation was seen for each sample from the Xingtai transect, whereas the grain radius of the apatites from the Archean gneiss is generally larger than that of the apatites from the sandstone and granodiorite (Figure S5). The apatites with larger grain size will experience lower fractional losses than smaller ones and will yield older AHe ages. Moreover, the apatites with larger grain size are more likely to contain inclusions, particularly for these collected from metamorphic rocks. Apatite grains from the sandstone sample XT19-3 at the higher elevation and granodiorite sample XT19-12 at the lower elevation have high quality and concentrated AHe ages, lending confidence of the dating results. Meanwhile the AHe ages from these two samples are consistent with that from the two youngest grains collected from the gneiss. Therefore, we tentatively excluded the anomalously older AHe ages that collected from the Archean metamorphic gneiss.

## References

- Chang, J., Qiu, N., Liu, S., Xu, Q., and Liu, N., 2019, Post-Triassic multiple exhumation of the Taihang Mountains revealed via low-T thermochronology: implications for the paleo-geomorphologic reconstruction of the North China Craton: *Gondwana Research*, v. 68, p. 34-49, <https://doi.org/10.1016/j.gr.2018.11.007>.
- Farley, K.A., 2000, Helium diffusion from apatite: General behavior as illustrated by Durango fluorapatite: *Journal of Geophysical Research: Solid Earth*, v. 105, p. 2903-2914, <https://doi.org/10.1029/1999JB900348>.
- Flowers, R.M., Ketcham, R.A., Shuster, D.L., and Farley, K.A., 2009, Apatite (U-Th)/He thermochronometry using a radiation damage accumulation and annealing model: *Geochimica et Cosmochimica acta*, v. 73, p. 2347-2365, <https://doi.org/10.1016/j.gca.2009.01.015>.
- Gallagher, K., 2012, Transdimensional inverse thermal history modeling for quantitative thermochronology: *Journal of Geophysical Research: Solid Earth*, v. 117, <https://doi.org/10.1029/2011JB008825>.

- Gautheron, C., Tassan-Got, L., Barbarand, J., and Pagel, M., 2009, Effect of alpha-damage annealing on apatite (U–Th)/He thermochronology: *Chemical Geology*, v. 266, p. 157-170, <https://doi.org/10.1016/j.chemgeo.2009.06.001>.
- Gleadow, A.J., Belton, D.X., Kohn, B.P., and Brown, R.W., 2002, Fission track dating of phosphate minerals and the thermochronology of apatite: *Reviews in mineralogy and geochemistry*, v. 48, p. 579-630, <https://doi.org/10.2138/rmg.2002.48.16>.
- Gleadow, A., Harrison, M., Kohn, B., Lugo-Zazueta, R., and Phillips, D., 2015, The Fish Canyon Tuff: A new look at an old low-temperature thermochronology standard: *Earth and Planetary Science Letters*, v. 424, p. 95-108, <https://doi.org/10.1016/j.epsl.2015.05.003>.
- Green, P.F., Crowhurst, P.V., Duddy, I.R., Japsen, P., and Holford, S.P., 2006, Conflicting (U–Th)/He and fission track ages in apatite: enhanced He retention, not anomalous annealing behaviour: *Earth and Planetary Science Letters*, v. 250, p. 407-427, <https://doi.org/10.1016/j.epsl.2006.08.022>.
- Hasebe, N., Barbarand, J., Jarvis, K., Carter, A., and Hurford, A.J., 2004, Apatite fission-track chronometry using laser ablation ICP-MS: *Chemical Geology*, v. 207, p. 135-145, <https://doi.org/10.1016/j.chemgeo.2004.01.007>.
- Hendriks, B., and Redfield, T., 2005, Apatite fission track and (U–Th)/He data from Fennoscandia: An example of underestimation of fission track annealing in apatite: *Earth and Planetary Science Letters*, v. 236, p. 443-458, <https://doi.org/10.1016/j.epsl.2005.05.027>.
- Hurford, A.J., and Green, P.F., 1982, A users' guide to fission track dating calibration: *Earth and Planetary Science Letters*, v. 59, p. 343-354, [https://doi.org/10.1016/0012-821X\(82\)90136-4](https://doi.org/10.1016/0012-821X(82)90136-4).
- Ketcham, R.A., Carter, A., Donelick, R.A., Barbarand, J., and Hurford, A.J., 2007, Improved modeling of fission-track annealing in apatite: *American Mineralogist*, v. 92, p. 799-810, <https://doi.org/10.2138/am.2007.2281>.
- Ketcham, R.A., Gautheron, C., and Tassan-Got, L., 2011, Accounting for long alpha-particle stopping distances in (U–Th–Sm)/He geochronology: Refinement of the baseline case: *Geochimica et Cosmochimica Acta*, v. 75, p. 7779-7791, <https://doi.org/10.1016/j.gca.2011.10.011>.
- Li, Y., Zhang, W., Yuan, B., Han, W., Chen, G., and Zhang, L., 2018, Basement composition for Weihe Cenozoic Basin and its petroleum geological significance: *Journal of Xi'an University of Science and Technology*, v. 38, p. 966-974, <https://doi.org/10.13800/j.cnki.xakjdxxb.2018.0613>.
- McDowell, F.W., McIntosh, W.C., and Farley, K.A., 2005, A precise  $^{40}\text{Ar}$ – $^{39}\text{Ar}$  reference age for the Durango apatite (U–Th)/He and fission-track dating standard: *Chemical Geology*, v. 214, p. 249-263, <https://doi.org/10.1016/j.chemgeo.2004.10.002>.
- Pang, J., Zheng, D., Ma, Y., Wang, Y., Wu, Y., Wan, J., Yu, J., Li, Y., and Wang, Y., 2017, Combined apatite fission-track dating, chlorine and REE content analysis by LA-ICPMS: *Science Bulletin*, v. 62, p. 1497-1500, <https://doi.org/10.1016/j.scib.2017.10.009>.
- Qing, J., Ji, J., Wang, J., Peng, Q., Niu, X., and Ge, Z., 2008, Apatite fission track study of Cenozoic uplifting and exhumation of Wutai Mountain, China: *Chinese Journal of Geophysics*, v. 51, p. 256-264, <https://doi.org/10.1002/cjg2.1217>.
- Reiners, P.W., and Brandon, M.T., 2006, Using thermochronology to understand orogenic erosion: *Annual Review of Earth and Planetary Sciences*, v. 34, p. 419-466, <https://doi.org/10.1146/annurev.earth.34.031405.125202>.
- Reiners, P.W. et al. *Geochronology and thermochronology*. John Wiley & Sons, 2017.
- Wolf, R., Farley, K., and Kass, D., 1998, Modeling of the temperature sensitivity of the apatite (U–Th)/He thermochronometer: *Chemical Geology*, v. 148, p. 105-114, [https://doi.org/10.1016/S0009-2541\(98\)00024-2](https://doi.org/10.1016/S0009-2541(98)00024-2).



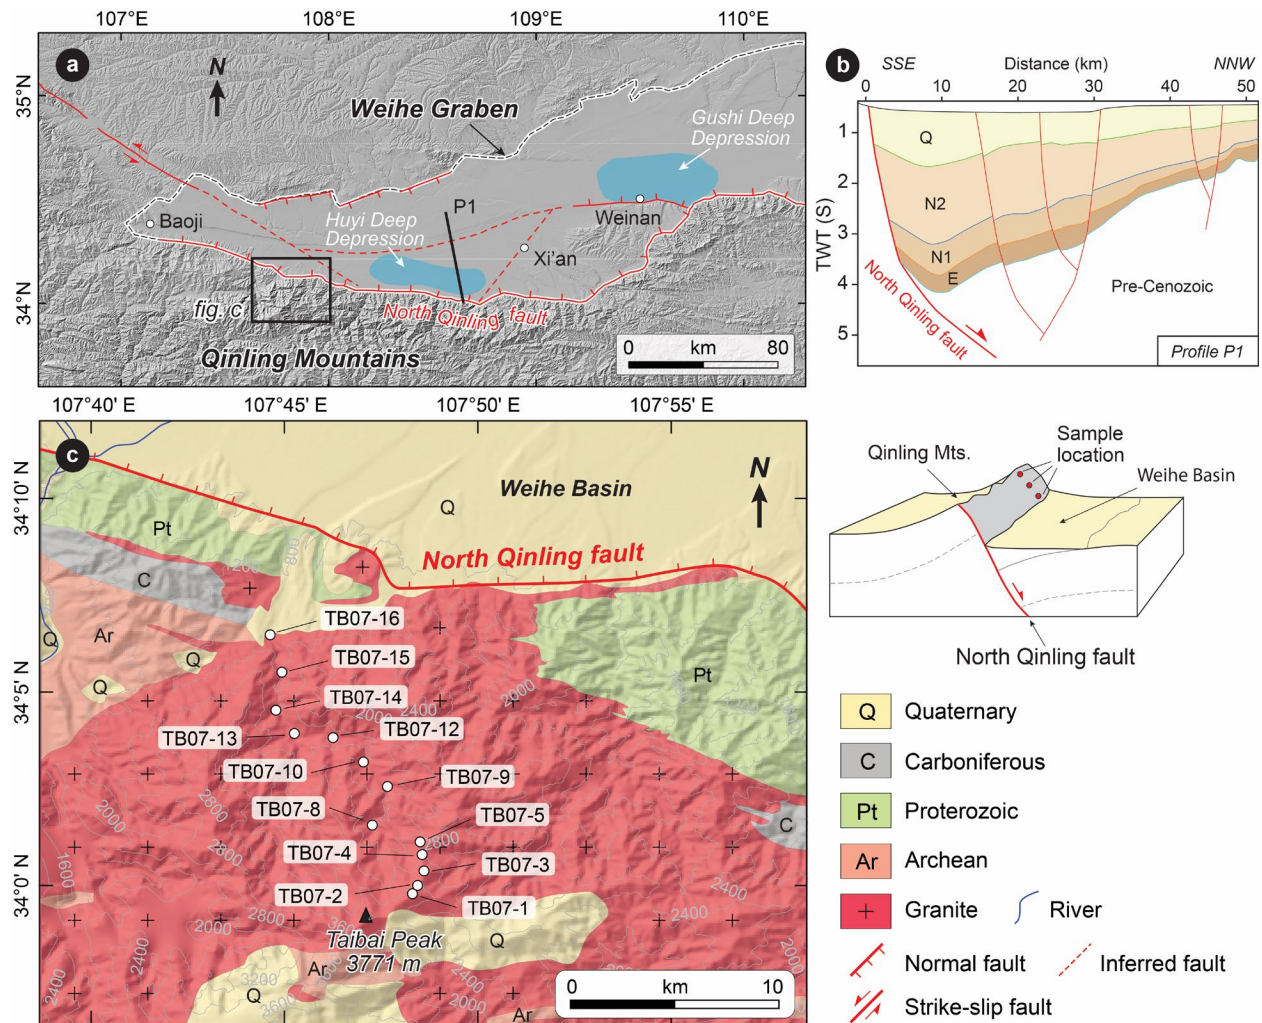

**Figure S1** (a) Shaded relief map of the Weihe Graben. Black dashed line refers to the area of the Weihe Graben. Red lines indicate the locations of faults. The location of a NNW-SSE-trending geophysical survey profile (P1) is shown. (b) A seismic reflection profile shows half-graben deposition in the Weihe Graben (Li et al., 2018), which is largely controlled by the North Qinling fault. The Cenozoic deposition began at the Eocene and accelerated at the early Neogene. (c) Geologic map of the northern Qinling showing sample locations of the Taibai transect. See the location in Fig. a. A schematic model on the right side shows the sampling locations in the uplifted footwall of a normal fault.

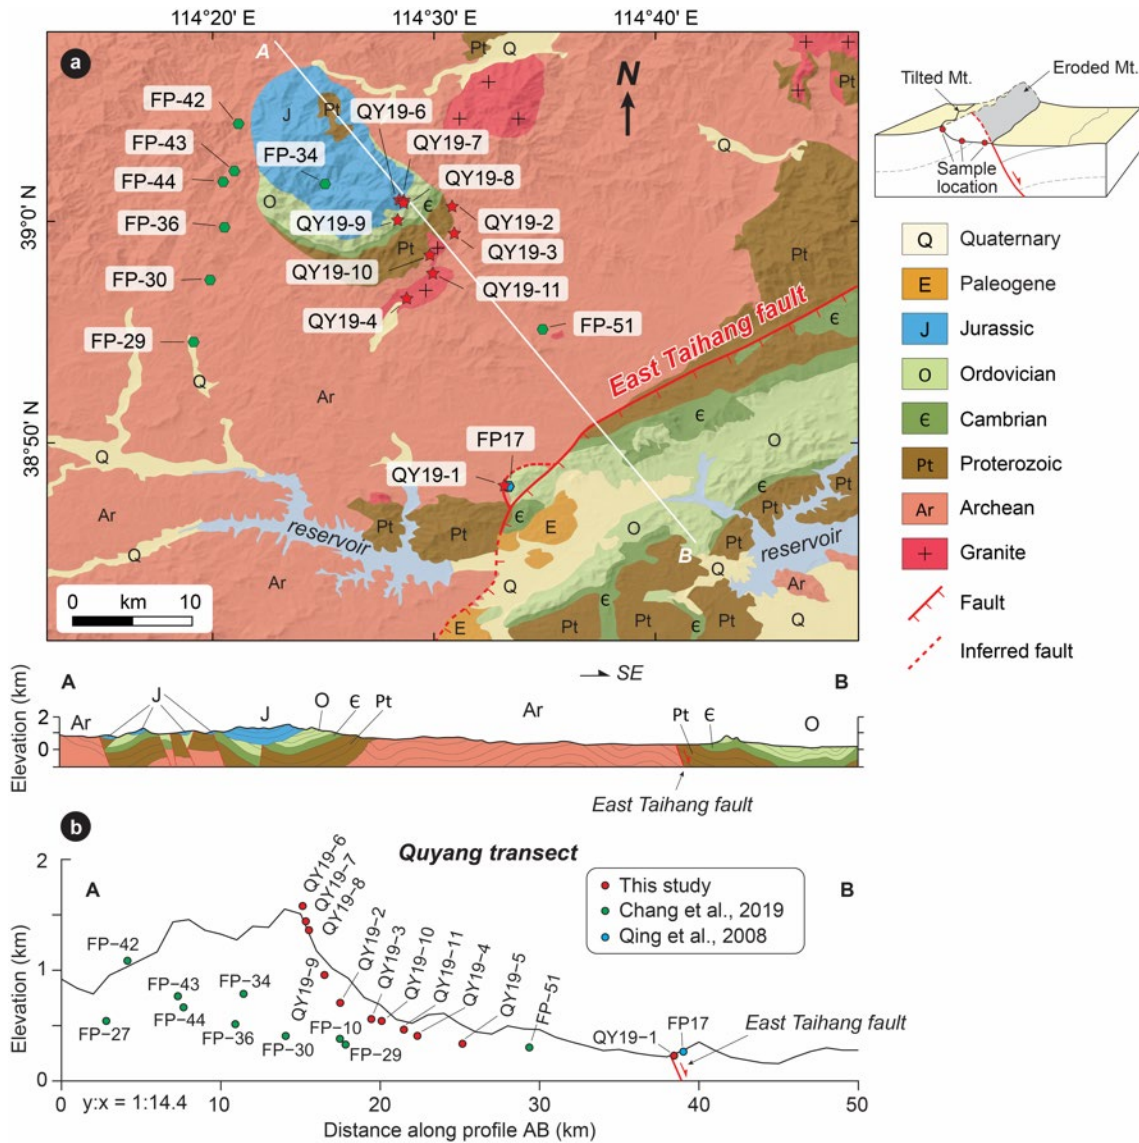

**Figure S2** (a) Geologic map show sample locations of the Quyang transect in this study (red star), Chang et al. (2019) (green hexagon), and Qing et al. (2008) (blue hexagon). See location in Figure 1. A NW-SE-trending geologic profile (A-B) was extracted based on the geologic map. A schematic model on the right side shows the sampling locations in the uplifted footwall of the normal East Taihang fault. (b) A topographic profile along A-B show the sampling locations.

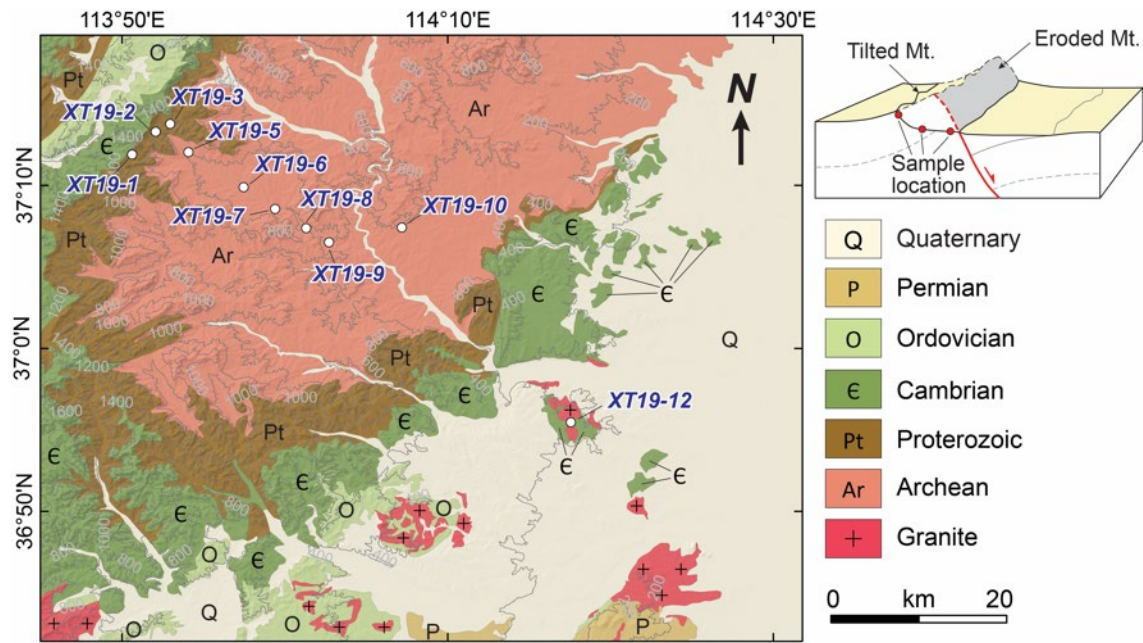

**Figure S3** Geologic map show sample locations of the Xingtai transect in this study. See location in Figure 1. A schematic model on the right side shows the sampling locations in the uplifted footwall of the normal East Taihang fault. The exact location of the East Taihang fault was not identified due to the covering Quaternary deposition.



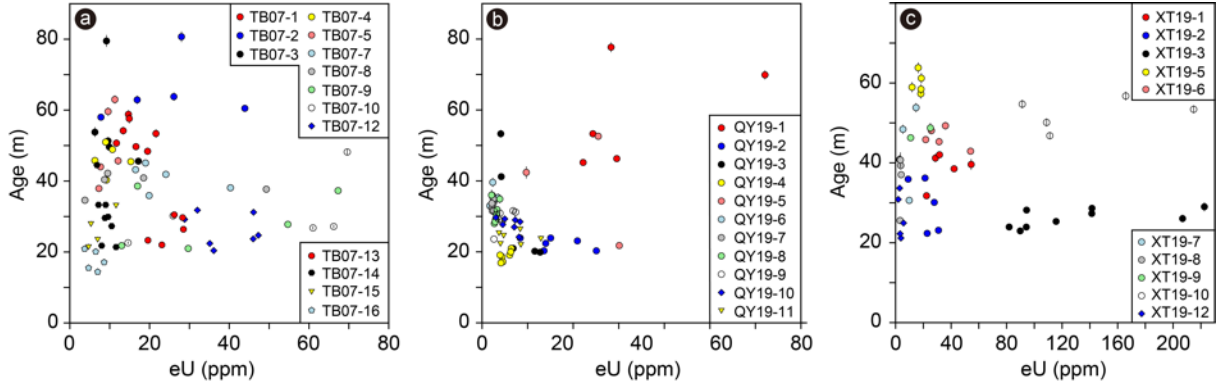

**Figure S4** Relationship between apatite (U-Th)/He age and eU concentration in multigrain aliquots of the samples from the Taibai (a), Quyang (b), and Xingtai (c) transects.

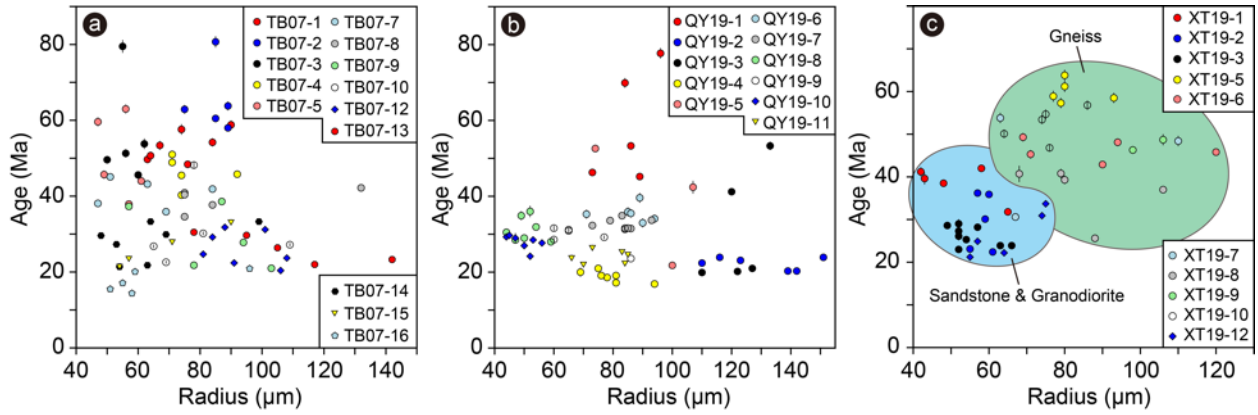

**Figure S5** Relationship between apatite (U-Th)/He age and grain radius in multigrain aliquots of samples from the Taibai (a), Quyang (b), and Xingtai (c) transects.



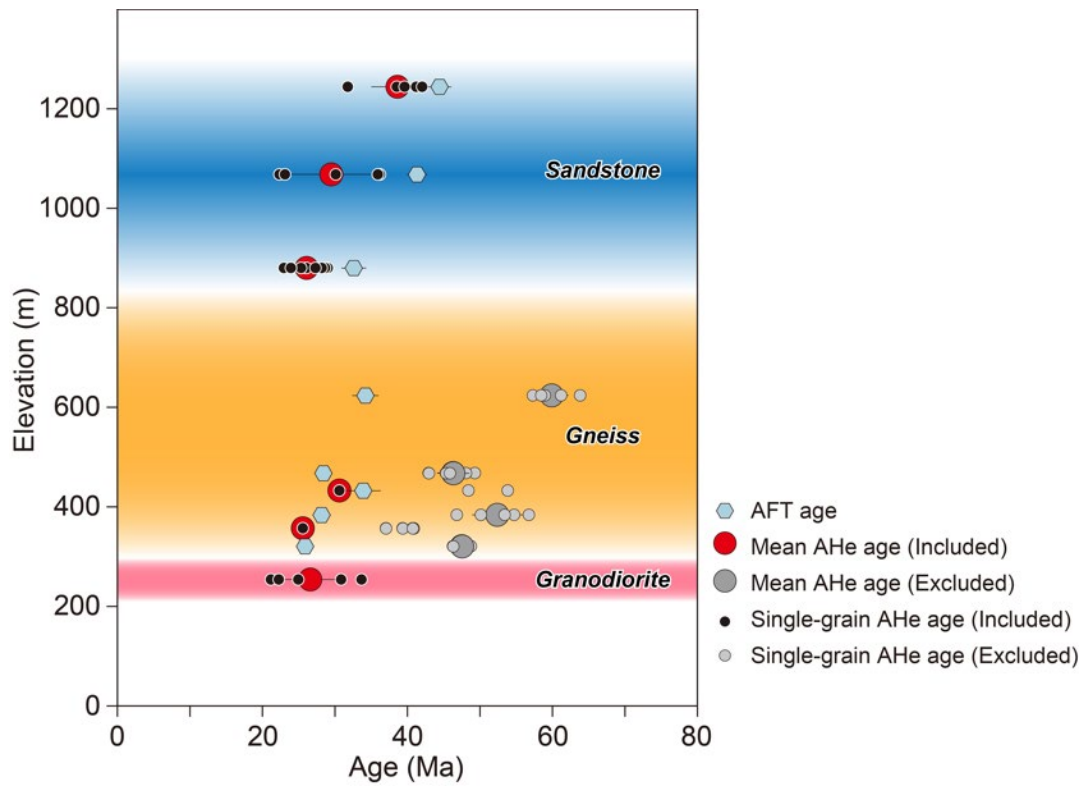

**Figure S6** Age-elevation relationship of samples from the Xingtai transect. All the anomalously older AHe ages, which are older than the fission-track ages from the same sample, are from the samples collected from the Archean gneiss.

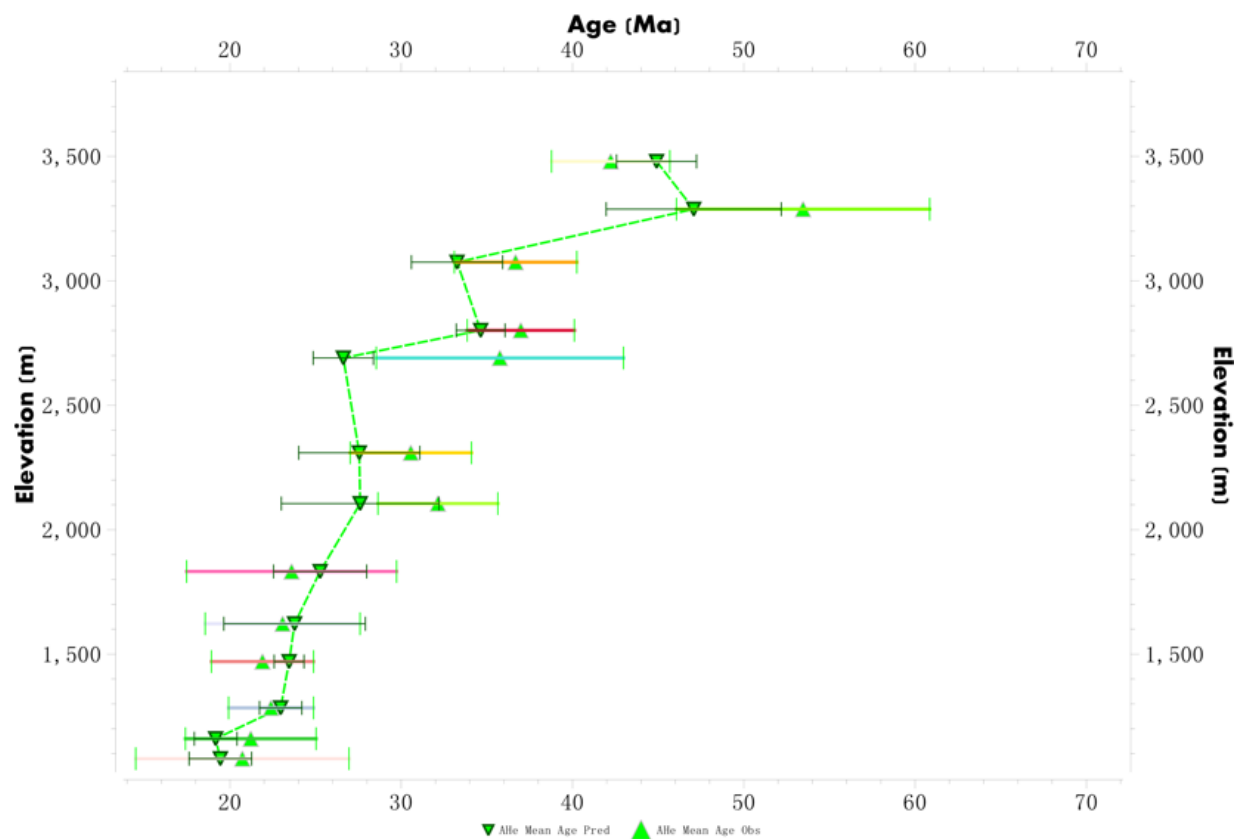

**Figure S7** Age-elevation relationship from the Taibai transect comparing the AHe observations with predictions derived from the expected thermal histories in QTQt. The mean for the observed AHe ages are shown as upward triangles, and the mean of the predictions as downward triangles.

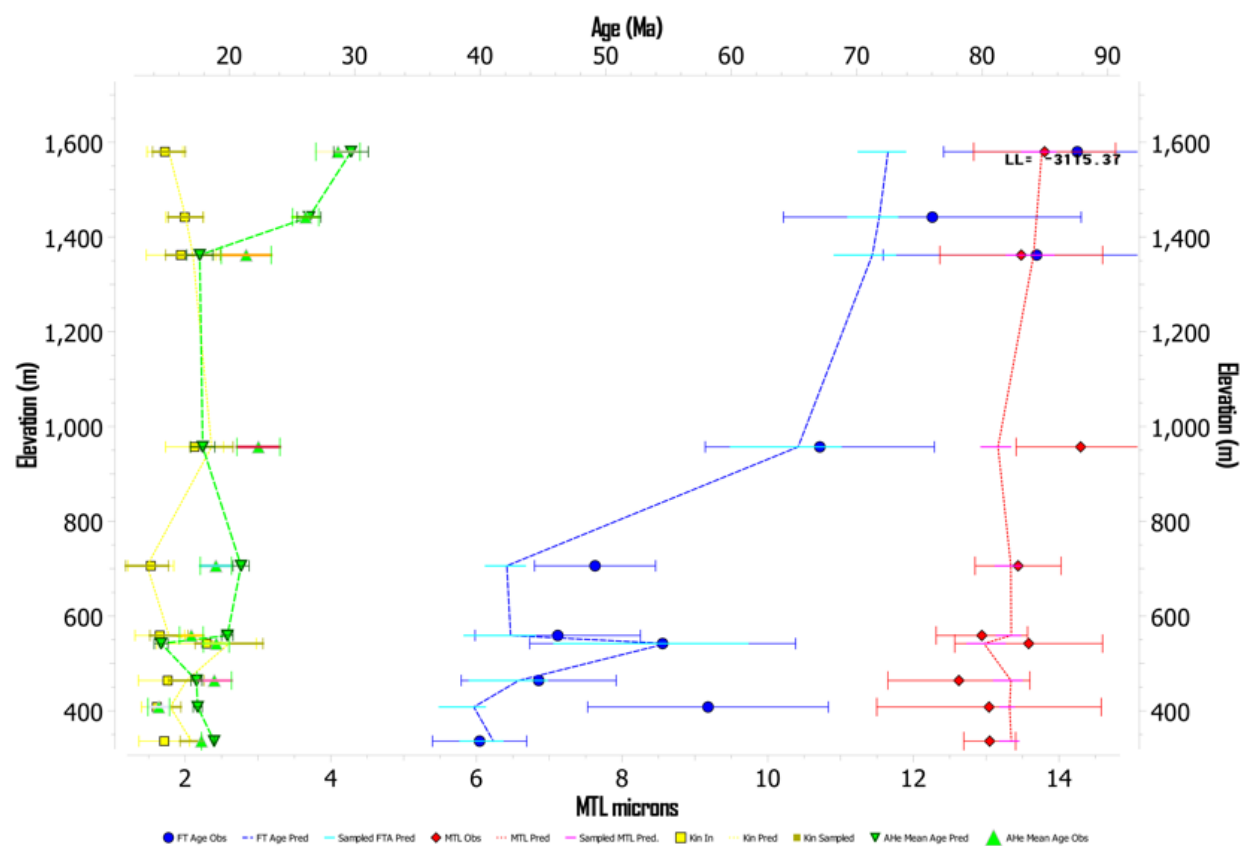

**Figure S8** Age-elevation and length-elevation relationships from the Quyang transect comparing the observations of the AFT and AHe ages and the AFT lengths with predictions derived from expected thermal histories in QTQt.

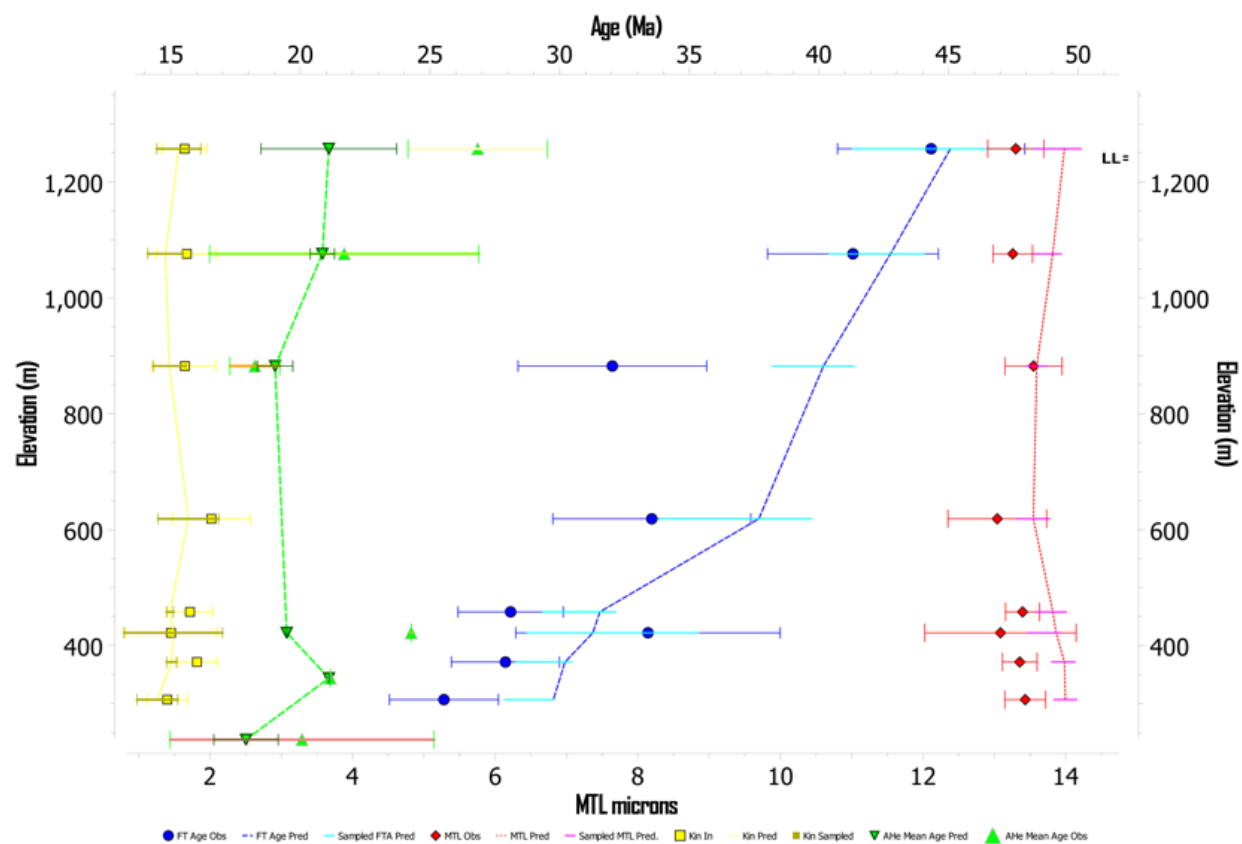

**Figure S9** Age-elevation and length-elevation relationships from the Xingtai transect comparing the observations of the AFT and AHe ages and the AFT lengths with predictions derived from expected thermal histories in QTQt.



**Table S1 Sample location and lithology**

| <b>Sample ID</b>               | <b>Longitude (°E)</b> | <b>Latitude (°N)</b> | <b>Elevation (m)</b> | <b>Lithology</b> |
|--------------------------------|-----------------------|----------------------|----------------------|------------------|
| <b><i>Taibai transect</i></b>  |                       |                      |                      |                  |
| TB07-1                         | 107.8052              | 33.9964              | 3480                 | Granite          |
| TB07-2                         | 107.8074              | 34.0000              | 3288                 | Granite          |
| TB07-3                         | 107.8102              | 34.0062              | 3075                 | Granite          |
| TB07-4                         | 107.8094              | 34.0133              | 2801                 | Granite          |
| TB07-5                         | 107.8085              | 34.0187              | 2690                 | Granite          |
| TB07-7                         | 107.7993              | 34.0167              | 2309                 | Granite          |
| TB07-8                         | 107.7879              | 34.0259              | 2105                 | Granite          |
| TB07-9                         | 107.7945              | 34.0426              | 1832                 | Granite          |
| TB07-10                        | 107.7841              | 34.0532              | 1622                 | Granite          |
| TB07-12                        | 107.7710              | 34.0636              | 1470                 | Granite          |
| TB07-13                        | 107.7543              | 34.0654              | 1284                 | Granite          |
| TB07-14                        | 107.7464              | 34.0754              | 1160                 | Granite          |
| TB07-15                        | 107.7489              | 34.0918              | 1080                 | Granite          |
| TB07-16                        | 107.7439              | 34.1079              | 990                  | Granite          |
| <b><i>Quyang transect</i></b>  |                       |                      |                      |                  |
| QY19-1                         | 114.5437              | 38.8027              | 229                  | Gneiss           |
| QY19-2                         | 114.5136              | 39.0122              | 706                  | Gneiss           |
| QY19-3                         | 114.5152              | 38.9921              | 559                  | Gneiss           |
| QY19-4                         | 114.4794              | 38.9430              | 408                  | Granite          |
| QY19-5                         | 114.4435              | 38.8944              | 336                  | Gneiss           |
| QY19-6                         | 114.4739              | 39.0174              | 1580                 | Breccia          |
| QY19-7                         | 114.4772              | 39.0170              | 1442                 | Breccia          |
| QY19-8                         | 114.4771              | 39.0147              | 1362                 | Breccia          |
| QY19-9                         | 114.4727              | 39.0021              | 957                  | Gneiss           |
| QY19-10                        | 114.4968              | 38.9758              | 542                  | Granite          |
| QY19-11                        | 114.4990              | 38.9619              | 464                  | Granite          |
| <b><i>Xingtai transect</i></b> |                       |                      |                      |                  |
| XT19-1                         | 113.8436              | 37.1981              | 1244                 | Sandstone        |
| XT19-2                         | 113.8678              | 37.2215              | 1068                 | Sandstone        |
| XT19-3                         | 113.8827              | 37.2294              | 880                  | Sandstone        |
| XT19-5                         | 113.9014              | 37.2006              | 624                  | Gneiss           |
| XT19-6                         | 113.9578              | 37.1648              | 468                  | Gneiss           |
| XT19-7                         | 113.9883              | 37.1434              | 433                  | Gneiss           |
| XT19-8                         | 114.0219              | 37.1228              | 357                  | Gneiss           |
| XT19-9                         | 114.0452              | 37.1083              | 321                  | Gneiss           |
| XT19-10                        | 114.1198              | 37.1234              | 384                  | Gneiss           |
| XT19-12                        | 114.2929              | 36.9243              | 254                  | Granodiorite     |

Table S2 Apatite (U-Th)/He data of the Taibai, Quyang, and Xingtai transects

| Sample                 | U<br>(ppm) | Th<br>(ppm) | He<br>(nmol/g) | eU<br>(ppm) | Mass<br>( $\mu$ g) | Length<br>( $\mu$ m) | Radius<br>( $\mu$ m) | Ft <sup>*</sup> | Raw age<br>(Ma) | err<br>(1 $\sigma$ ) | Corr age<br>(Ma) | err<br>(1 $\sigma$ )    |
|------------------------|------------|-------------|----------------|-------------|--------------------|----------------------|----------------------|-----------------|-----------------|----------------------|------------------|-------------------------|
| <i>Taibai transect</i> |            |             |                |             |                    |                      |                      |                 |                 |                      |                  |                         |
| TB07-1-1               | 11.3       | 9.3         | 3.2            | 13.4        | 14.1               | 288                  | 84                   | 0.82            | 44.4            | 0.9                  | 54.2             | 1.1                     |
| TB07-1-2               | 12.7       | 8.5         | 3.9            | 14.7        | 16.1               | 268                  | 90                   | 0.83            | 48.9            | 1                    | 58.8             | 1.2                     |
| TB07-1-3               | 13.1       | 8           | 3.7            | 14.9        | 9.3                | 242                  | 74                   | 0.79            | 45.8            | 1.1                  | 57.6             | 1.4                     |
| TB07-1-4               | 17.2       | 10          | 4.1            | 19.5        | 9.4                | 207                  | 76                   | 0.8             | 38.8            | 0.8                  | 48.4             | 1.0                     |
| TB07-1-5               | 14.2       | 10.1        | 3.4            | 16.6        | 5.4                | 176                  | 63                   | 0.76            | 37.8            | 0.8                  | 49.7             | 1.0                     |
| TB07-1-6               | 19         | 11.3        | 4.8            | 21.6        | 6.5                | 187                  | 67                   | 0.77            | 41.3            | 0.9                  | 53.4             | 1.2                     |
| TB07-1-7               | 10.3       | 5.8         | 2.4            | 11.7        | 5.6                | 183                  | 64                   | 0.76            | 38.6            | 0.8                  | 50.7             | 1.1                     |
| <b>TB07-1</b>          |            |             |                |             |                    |                      |                      |                 |                 |                      | <b>53.3</b>      | <b>3.7<sup>##</sup></b> |
| TB07-2-1**             | 27.4       | 2.2         | 10.0           | 28          | 13.4               | 252                  | 85                   | 0.82            | 66.3            | 1.2                  | 80.7             | 1.5                     |
| TB07-2-2               | 25.6       | 1.8         | 7.5            | 26.1        | 15.4               | 256                  | 89                   | 0.83            | 53              | 1                    | 63.8             | 1.2                     |
| TB07-2-3               | 15.6       | 4.6         | 4.5            | 16.9        | 9.5                | 236                  | 75                   | 0.8             | 50.1            | 1                    | 62.9             | 1.2                     |
| TB07-2-4               | 42.9       | 3.8         | 11.8           | 43.9        | 13.2               | 229                  | 85                   | 0.82            | 49.8            | 0.9                  | 60.5             | 1.0                     |
| TB07-2-5               | 5.5        | 9.6         | 2.0            | 7.8         | 14.7               | 228                  | 89                   | 0.83            | 48.1            | 0.8                  | 58.0             | 0.9                     |
| <b>TB07-2</b>          |            |             |                |             |                    |                      |                      |                 |                 |                      | <b>61.3</b>      | <b>2.3</b>              |
| TB07-3-1               | 7.4        | 7.8         | 1.9            | 9.6         | 4.3                | 199                  | 56                   | 0.73            | 37.5            | 0.8                  | 51.3             | 1.1                     |
| TB07-3-2               | 5          | 4.7         | 1.3            | 6.3         | 5.5                | 195                  | 62                   | 0.76            | 40.7            | 1.1                  | 53.8             | 1.4                     |
| TB07-3-3               | 13.9       | 13          | 3.1            | 17.2        | 4.9                | 194                  | 60                   | 0.75            | 34              | 0.6                  | 45.6             | 0.9                     |
| TB07-3-4               | 7.9        | 6.4         | 1.7            | 9.9         | 2.9                | 170                  | 50                   | 0.69            | 34.5            | 0.7                  | 49.6             | 1.0                     |
| TB07-3-5**             | 6.9        | 7.9         | 2.7            | 9.2         | 4.2                | 213                  | 55                   | 0.72            | 57.6            | 1.3                  | 79.5             | 1.7                     |
| <b>TB07-3</b>          |            |             |                |             |                    |                      |                      |                 |                 |                      | <b>50.1</b>      | <b>3.0</b>              |
| TB07-4-1               | 5.6        | 2.7         | 1.3            | 6.3         | 17.1               | 262                  | 92                   | 0.84            | 38.2            | 0.8                  | 45.8             | 0.9                     |
| TB07-4-2               | 8          | 3.7         | 1.9            | 9           | 9.2                | 279                  | 71                   | 0.79            | 40.1            | 0.8                  | 51.0             | 1.0                     |
| TB07-4-3               | 13.7       | 5.9         | 2.9            | 15.3        | 8.1                | 163                  | 74                   | 0.79            | 36.1            | 0.7                  | 45.5             | 0.9                     |
| TB07-4-4               | 9.7        | 3.4         | 2.2            | 10.7        | 7.6                | 183                  | 71                   | 0.79            | 38.5            | 0.8                  | 48.9             | 1.0                     |
| TB07-4-5               | 8.1        | 3.6         | 1.6            | 9.2         | 9.1                | 230                  | 74                   | 0.79            | 32              | 0.7                  | 40.3             | 0.8                     |
| <b>TB07-4</b>          |            |             |                |             |                    |                      |                      |                 |                 |                      | <b>46.3</b>      | <b>3.6</b>              |
| TB07-5-1               | 4.4        | 13          | 1.3            | 7.7         | 4.9                | 166                  | 61                   | 0.75            | 33              | 0.7                  | 44.0             | 0.9                     |

|                |      |      |      |      |      |     |     |      |      |     |             |            |
|----------------|------|------|------|------|------|-----|-----|------|------|-----|-------------|------------|
| TB07-5-2       | 7.2  | 16.2 | 2.7  | 11.3 | 3.9  | 176 | 56  | 0.73 | 45.8 | 0.9 | 63.0        | 1.2        |
| TB07-5-3       | 4.3  | 11.2 | 1.1  | 7.3  | 4.2  | 172 | 57  | 0.74 | 27.9 | 0.5 | 37.9        | 0.7        |
| TB07-5-4       | 7.7  | 16.4 | 2.0  | 12.1 | 2.7  | 157 | 49  | 0.69 | 31.7 | 0.7 | 45.7        | 1.1        |
| TB07-5-5       | 5.1  | 16.6 | 2.0  | 9.6  | 2.5  | 170 | 47  | 0.68 | 40.4 | 0.8 | 59.6        | 1.2        |
| <b>TB07-5</b>  |      |      |      |      |      |     |     |      |      |     | <b>50.0</b> | <b>9.6</b> |
| TB07-7-1       | 17.8 | 8.9  | 3.0  | 19.9 | 7.1  | 201 | 69  | 0.78 | 27.9 | 0.5 | 35.9        | 0.6        |
| TB07-7-2       | 14.5 | 8.7  | 2.9  | 16.5 | 5.3  | 168 | 63  | 0.76 | 32.8 | 0.6 | 43.2        | 0.8        |
| TB07-7-3       | 35.7 | 20.0 | 5.5  | 40.3 | 2.3  | 138 | 47  | 0.68 | 25.9 | 0.6 | 38.1        | 0.9        |
| TB07-7-4       | 21.1 | 13.1 | 4.5  | 24.1 | 14.6 | 308 | 84  | 0.82 | 34.4 | 0.6 | 41.9        | 0.7        |
| TB07-7-5       | 16.8 | 9.3  | 3.2  | 19.0 | 3.1  | 172 | 51  | 0.70 | 31.8 | 0.6 | 45.1        | 0.8        |
| <b>TB07-7</b>  |      |      |      |      |      |     |     |      |      |     | <b>40.8</b> | <b>3.4</b> |
| TB07-8-1       | 40.8 | 36.4 | 8.2  | 49.3 | 12.6 | 235 | 84  | 0.82 | 30.9 | 0.5 | 37.7        | 0.6        |
| TB07-8-2       | 3    | 2.9  | 0.5  | 3.8  | 9.2  | 217 | 75  | 0.8  | 27.6 | 0.8 | 34.6        | 0.9        |
| TB07-8-3       | 15.4 | 12.6 | 3.2  | 18.5 | 9.1  | 214 | 75  | 0.8  | 32.6 | 0.6 | 40.9        | 0.8        |
| TB07-8-4       | 7    | 6.6  | 1.5  | 8.7  | 9.4  | 220 | 75  | 0.8  | 32.3 | 0.6 | 40.4        | 0.8        |
| TB07-8-5       | 7.7  | 7.5  | 1.9  | 9.5  | 48.1 | 337 | 132 | 0.89 | 37.3 | 0.7 | 42.2        | 0.7        |
| <b>TB07-8</b>  |      |      |      |      |      |     |     |      |      |     | <b>39.2</b> | <b>2.7</b> |
| TB07-9-1       | 19.8 | 42.6 | 2.9  | 29.7 | 25.3 | 332 | 103 | 0.85 | 17.9 | 0.3 | 21.0        | 0.3        |
| TB07-9-2       | 10.5 | 10.9 | 1.2  | 13   | 11.1 | 259 | 78  | 0.81 | 17.6 | 0.3 | 21.8        | 0.4        |
| TB07-9-3       | 44.7 | 43.4 | 6.9  | 54.7 | 18.4 | 278 | 94  | 0.84 | 23.3 | 0.4 | 27.8        | 0.5        |
| TB07-9-4       | 53.3 | 61   | 10.0 | 67.3 | 4.7  | 228 | 57  | 0.73 | 27.4 | 0.5 | 37.3        | 0.6        |
| TB07-9-5       | 10.9 | 26.4 | 3.0  | 17   | 14.9 | 273 | 87  | 0.83 | 31.8 | 0.5 | 38.6        | 0.6        |
| <b>TB07-9</b>  |      |      |      |      |      |     |     |      |      |     | <b>29.3</b> | <b>7.5</b> |
| TB07-10-1**    | 63.7 | 25.8 | 14.7 | 69.6 | 10.8 | 241 | 78  | 0.81 | 38.9 | 0.7 | 48.2        | 0.8        |
| TB07-10-2      | 57.6 | 37.6 | 8.4  | 66.2 | 27.4 | 289 | 109 | 0.86 | 23.4 | 0.4 | 27.2        | 0.5        |
| TB07-10-3      | 55.6 | 23.6 | 6.8  | 61   | 5.9  | 181 | 65  | 0.77 | 20.5 | 0.4 | 26.8        | 0.5        |
| TB07-10-4      | 22.8 | 13.3 | 3.4  | 25.9 | 10.8 | 201 | 81  | 0.81 | 24.5 | 0.4 | 30.2        | 0.5        |
| TB07-10-5      | 13.7 | 4.1  | 1.4  | 14.6 | 6.7  | 165 | 69  | 0.78 | 17.6 | 0.3 | 22.6        | 0.4        |
| <b>TB07-10</b> |      |      |      |      |      |     |     |      |      |     | <b>26.7</b> | <b>2.7</b> |
| TB07-12-1      | 29.9 | 9    | 4.6  | 32   | 15.5 | 283 | 88  | 0.83 | 26.3 | 0.5 | 31.8        | 0.6        |
| TB07-12-2      | 43.2 | 12.2 | 5.1  | 46   | 27.4 | 300 | 108 | 0.86 | 20.3 | 0.4 | 23.7        | 0.4        |
| TB07-12-3      | 26.4 | 10.6 | 3.7  | 28.8 | 12.1 | 201 | 84  | 0.82 | 23.9 | 0.5 | 29.2        | 0.6        |

|                        |      |      |     |      |      |     |     |      |      |     |             |            |
|------------------------|------|------|-----|------|------|-----|-----|------|------|-----|-------------|------------|
| TB07-12-4              | 42.3 | 16.5 | 6.6 | 46.1 | 26.1 | 390 | 101 | 0.85 | 26.5 | 0.4 | 31.2        | 0.5        |
| TB07-12-5              | 33   | 13.5 | 3.4 | 36.1 | 28.4 | 372 | 106 | 0.86 | 17.5 | 0.3 | 20.4        | 0.4        |
| TB07-12-6              | 42.7 | 19.9 | 5.2 | 47.3 | 12.7 | 278 | 81  | 0.81 | 20.1 | 0.4 | 24.7        | 0.5        |
| TB07-12-7              | 32.7 | 10.4 | 3.5 | 35.1 | 16.2 | 254 | 91  | 0.83 | 18.7 | 0.3 | 22.4        | 0.4        |
| <b>TB07-12</b>         |      |      |     |      |      |     |     |      |      |     | <b>26.2</b> | <b>4.2</b> |
| TB07-13-1              | 25.9 | 10.3 | 3.8 | 28.3 | 18.6 | 264 | 95  | 0.84 | 24.9 | 0.4 | 29.7        | 0.5        |
| TB07-13-2              | 26.1 | 10.5 | 3.5 | 28.5 | 25   | 305 | 105 | 0.85 | 22.6 | 0.4 | 26.4        | 0.5        |
| TB07-13-3              | 20.9 | 9.7  | 2.4 | 23.1 | 34.7 | 330 | 117 | 0.87 | 19.1 | 0.3 | 22.0        | 0.4        |
| TB07-13-4              | 17.2 | 10.5 | 2.2 | 19.6 | 61.7 | 389 | 142 | 0.89 | 20.8 | 0.3 | 23.3        | 0.4        |
| TB07-13-5              | 24   | 9.6  | 3.5 | 26.2 | 10.6 | 236 | 78  | 0.81 | 24.6 | 0.5 | 30.5        | 0.6        |
| <b>TB07-13</b>         |      |      |     |      |      |     |     |      |      |     | <b>26.4</b> | <b>3.4</b> |
| TB07-14-1              | 6.8  | 9.3  | 1.2 | 9    | 5.5  | 169 | 64  | 0.76 | 25.4 | 0.5 | 33.3        | 0.7        |
| TB07-14-2              | 8.5  | 8.7  | 1.1 | 10.5 | 3.5  | 179 | 53  | 0.72 | 19.5 | 0.5 | 27.3        | 0.7        |
| TB07-14-3              | 4.6  | 11.5 | 1.1 | 7.2  | 23.2 | 341 | 99  | 0.85 | 28.2 | 0.5 | 33.3        | 0.5        |
| TB07-14-4              | 6    | 8.5  | 0.7 | 8    | 5.8  | 202 | 63  | 0.76 | 16.6 | 0.4 | 21.8        | 0.5        |
| TB07-14-5              | 6.5  | 10.2 | 1.0 | 8.8  | 2.6  | 167 | 48  | 0.68 | 20.2 | 0.5 | 29.6        | 0.7        |
| TB07-14-6              | 6.6  | 21.7 | 1.0 | 11.6 | 3.4  | 161 | 54  | 0.72 | 15.3 | 0.4 | 21.4        | 0.5        |
| TB07-14-7              | 7.3  | 9.8  | 1.2 | 9.6  | 6.6  | 165 | 69  | 0.78 | 23.3 | 0.5 | 29.9        | 0.6        |
| <b>TB07-14</b>         |      |      |     |      |      |     |     |      |      |     | <b>28.1</b> | <b>4.5</b> |
| TB07-15-1              | 5.2  | 8    | 0.7 | 7    | 4.3  | 184 | 57  | 0.74 | 17.5 | 0.4 | 23.7        | 0.6        |
| TB07-15-2              | 8.7  | 12.8 | 1.8 | 11.6 | 15.9 | 268 | 90  | 0.83 | 27.7 | 0.5 | 33.3        | 0.6        |
| TB07-15-3              | 3.8  | 6.9  | 0.6 | 5.3  | 7.5  | 192 | 71  | 0.78 | 22.1 | 0.5 | 28.1        | 0.6        |
| TB07-15-4              | 3.1  | 6.8  | 0.4 | 4.7  | 3.4  | 149 | 54  | 0.72 | 15.6 | 0.5 | 21.6        | 0.7        |
| <b>TB07-15</b>         |      |      |     |      |      |     |     |      |      |     | <b>26.7</b> | <b>4.5</b> |
| TB07-16-1              | 4.4  | 9.3  | 0.5 | 6.5  | 4.5  | 168 | 59  | 0.74 | 15   | 0.4 | 20.1        | 0.5        |
| TB07-16-2              | 4.6  | 10.3 | 0.4 | 7    | 4.4  | 187 | 58  | 0.74 | 10.6 | 0.3 | 14.4        | 0.4        |
| TB07-16-3              | 6.1  | 11.3 | 0.6 | 8.6  | 3.7  | 169 | 55  | 0.72 | 12.4 | 0.3 | 17.1        | 0.4        |
| TB07-16-4              | 3.5  | 5.3  | 0.3 | 4.7  | 3.1  | 178 | 51  | 0.7  | 10.9 | 0.4 | 15.5        | 0.6        |
| TB07-16-5              | 2.5  | 5    | 0.4 | 3.7  | 18.4 | 251 | 96  | 0.84 | 17.6 | 0.4 | 20.9        | 0.5        |
| <b>TB07-16</b>         |      |      |     |      |      |     |     |      |      |     | <b>17.6</b> | <b>2.5</b> |
| <b>Quyung transect</b> |      |      |     |      |      |     |     |      |      |     |             |            |
| QY19-1-1               | 28.9 | 2.6  | 6.1 | 29.6 | 10.0 | 311 | 73  | 0.83 | 38.2 | 0.7 | 46.3        | 0.9        |



|               |      |      |      |      |      |     |     |      |      |     |             |             |
|---------------|------|------|------|------|------|-----|-----|------|------|-----|-------------|-------------|
| QY19-1-2      | 60.6 | 6.3  | 19.6 | 62.1 | 10.7 | 277 | 84  | 0.84 | 58.4 | 1.1 | 69.9        | 1.3         |
| QY19-1-3      | 24.0 | 1.6  | 5.9  | 24.3 | 13.8 | 361 | 86  | 0.84 | 44.7 | 0.8 | 53.3        | 1.0         |
| QY19-1-4      | 21.8 | 1.7  | 4.6  | 22.2 | 15.0 | 366 | 89  | 0.84 | 38.1 | 0.7 | 45.2        | 0.8         |
| QY19-1-5      | 27.6 | 3.1  | 10.3 | 28.3 | 22.4 | 400 | 96  | 0.87 | 67.3 | 1.2 | 77.7        | 1.4         |
| <b>QY19-1</b> |      |      |      |      |      |     |     |      |      |     | <b>58.5</b> | <b>13.0</b> |
| QY19-2-1      | 12.0 | 6.8  | 1.3  | 13.6 | 50.6 | 457 | 142 | 0.90 | 18.2 | 0.3 | 20.3        | 0.3         |
| QY19-2-2      | 22.5 | 11.0 | 2.5  | 25.1 | 66.3 | 559 | 139 | 0.91 | 18.4 | 0.3 | 20.3        | 0.3         |
| QY19-2-3      | 5.5  | 12.1 | 1.0  | 8.4  | 84.6 | 480 | 151 | 0.90 | 21.5 | 0.4 | 23.9        | 0.4         |
| QY19-2-4      | 13.4 | 7.0  | 1.7  | 15.1 | 36.8 | 339 | 116 | 0.87 | 20.9 | 0.4 | 23.9        | 0.5         |
| QY19-2-5      | 12.7 | 5.5  | 1.5  | 14.0 | 32.3 | 335 | 110 | 0.87 | 19.4 | 0.4 | 22.4        | 0.4         |
| QY19-2-6      | 17.1 | 16.4 | 2.3  | 20.9 | 44.8 | 382 | 123 | 0.88 | 20.3 | 0.4 | 23.1        | 0.4         |
| <b>QY19-2</b> |      |      |      |      |      |     |     |      |      |     | <b>22.3</b> | <b>1.5</b>  |
| QY19-3-1      | 11.0 | 2.5  | 1.1  | 11.6 | 35.9 | 460 | 122 | 0.88 | 17.9 | 0.3 | 20.2        | 0.3         |
| QY19-3-2**    | 3.9  | 1.2  | 0.8  | 4.2  | 39.4 | 330 | 120 | 0.88 | 36.2 | 0.7 | 41.2        | 0.8         |
| QY19-3-3      | 12.0 | 3.1  | 1.2  | 12.7 | 33.1 | 364 | 110 | 0.87 | 17.2 | 0.3 | 19.9        | 0.4         |
| QY19-3-4**    | 4.0  | 0.4  | 1.1  | 4.1  | 53.5 | 350 | 133 | 0.89 | 47.5 | 1.0 | 53.3        | 1.1         |
| QY19-3-5      | 6.5  | 1.2  | 0.7  | 6.8  | 45.9 | 335 | 127 | 0.89 | 18.6 | 0.4 | 21.0        | 0.5         |
| <b>QY19-3</b> |      |      |      |      |      |     |     |      |      |     | <b>20.3</b> | <b>0.5</b>  |
| QY19-4-1      | 4.0  | 10.3 | 0.6  | 6.4  | 11.7 | 349 | 75  | 0.81 | 16.9 | 0.3 | 21.0        | 0.3         |
| QY19-4-2      | 3.7  | 9.9  | 0.5  | 6.1  | 16.7 | 385 | 81  | 0.84 | 16.1 | 0.3 | 19.1        | 0.3         |
| QY19-4-3      | 4.7  | 6.9  | 0.5  | 6.3  | 7.5  | 186 | 69  | 0.79 | 15.8 | 0.3 | 20.0        | 1.2         |
| QY19-4-4      | 2.7  | 7.0  | 0.4  | 4.4  | 10.7 | 180 | 78  | 0.81 | 15.1 | 0.5 | 18.6        | 0.6         |
| QY19-4-5      | 3.1  | 6.0  | 0.3  | 4.5  | 13.3 | 272 | 81  | 0.82 | 14.1 | 0.5 | 17.2        | 0.6         |
| QY19-4-6      | 2.5  | 7.2  | 0.3  | 4.2  | 22.4 | 352 | 94  | 0.84 | 14.2 | 0.5 | 16.9        | 0.6         |
| QY19-4-7      | 2.2  | 7.3  | 0.3  | 3.9  | 10.8 | 242 | 76  | 0.80 | 15.4 | 0.5 | 19.1        | 0.6         |
| <b>QY19-4</b> |      |      |      |      |      |     |     |      |      |     | <b>18.8</b> | <b>1.3</b>  |
| QY19-5-1      | 27.6 | 10.8 | 3.0  | 30.1 | 19.5 | 372 | 100 | 0.86 | 18.7 | 0.3 | 21.8        | 0.4         |
| QY19-5-2**    | 21.9 | 15.2 | 5.9  | 25.5 | 8.6  | 296 | 74  | 0.81 | 42.6 | 0.8 | 52.6        | 1.0         |
| QY19-5-3**    | 8.8  | 3.8  | 1.9  | 9.7  | 27.2 | 260 | 107 | 0.86 | 36.7 | 1.5 | 42.4        | 1.7         |
| <b>QY19-5</b> |      |      |      |      |      |     |     |      |      |     | <b>21.8</b> | <b>0.4</b>  |
| QY19-6-1      | 1.7  | 7.5  | 0.5  | 3.5  | 8.9  | 232 | 71  | 0.79 | 27.9 | 0.9 | 35.3        | 1.2         |
| QY19-6-2      | 1.2  | 4.4  | 0.4  | 2.3  | 14.6 | 247 | 85  | 0.82 | 29.6 | 1.0 | 35.9        | 1.2         |

|               |     |      |     |     |      |     |    |      |      |     |             |            |
|---------------|-----|------|-----|-----|------|-----|----|------|------|-----|-------------|------------|
| QY19-6-3      | 1.1 | 5.3  | 0.4 | 2.3 | 15.9 | 238 | 89 | 0.83 | 32.8 | 1.1 | 39.6        | 1.3        |
| QY19-6-4      | 0.8 | 3.9  | 0.3 | 1.7 | 21.5 | 381 | 90 | 0.83 | 27.4 | 1.0 | 33.0        | 1.2        |
| QY19-6-5      | 1.0 | 5.5  | 0.4 | 2.3 | 15.1 | 247 | 86 | 0.82 | 29.3 | 0.9 | 35.5        | 1.1        |
| QY19-6-6      | 1.3 | 5.4  | 0.4 | 2.5 | 19.2 | 255 | 94 | 0.84 | 28.6 | 0.9 | 34.1        | 1.1        |
| <b>QY19-6</b> |     |      |     |     |      |     |    |      |      |     | <b>35.6</b> | <b>2.0</b> |
| QY19-7-1      | 1.4 | 6.3  | 0.4 | 2.8 | 15.6 | 267 | 86 | 0.82 | 26.0 | 0.8 | 31.5        | 0.0        |
| QY19-7-2      | 1.3 | 4.6  | 0.4 | 2.4 | 13.2 | 290 | 79 | 0.81 | 27.2 | 0.6 | 33.6        | 0.7        |
| QY19-7-3      | 1.4 | 5.5  | 0.4 | 2.7 | 17.7 | 359 | 84 | 0.82 | 25.7 | 0.5 | 31.3        | 0.6        |
| QY19-7-4      | 1.1 | 4.4  | 0.3 | 2.2 | 9.7  | 240 | 73 | 0.80 | 25.7 | 0.5 | 32.3        | 0.7        |
| QY19-7-5      | 1.3 | 5.0  | 0.4 | 2.5 | 14.9 | 290 | 83 | 0.82 | 28.6 | 0.6 | 34.9        | 0.8        |
| QY19-7-6      | 1.2 | 4.4  | 0.3 | 2.2 | 15.8 | 295 | 85 | 0.82 | 26.0 | 0.6 | 31.6        | 0.7        |
| QY19-7-7      | 1.2 | 4.0  | 0.3 | 2.2 | 23.0 | 371 | 93 | 0.84 | 28.2 | 0.5 | 33.7        | 0.6        |
| <b>QY19-7</b> |     |      |     |     |      |     |    |      |      |     | <b>32.7</b> | <b>1.3</b> |
| QY19-8-1      | 1.6 | 7.4  | 0.4 | 3.3 | 4.4  | 209 | 54 | 0.73 | 23.2 | 0.6 | 31.9        | 0.9        |
| QY19-8-2      | 1.7 | 9.3  | 0.5 | 3.9 | 3.1  | 175 | 49 | 0.70 | 24.5 | 0.8 | 34.9        | 1.2        |
| QY19-8-3      | 1.7 | 6.2  | 0.3 | 3.1 | 2.2  | 156 | 44 | 0.67 | 20.5 | 0.7 | 30.5        | 1.0        |
| QY19-8-4      | 1.1 | 7.9  | 0.3 | 2.9 | 3.3  | 174 | 50 | 0.70 | 20.4 | 0.6 | 29.0        | 0.9        |
| QY19-8-5      | 1.1 | 4.1  | 0.3 | 2.1 | 3.4  | 161 | 52 | 0.72 | 25.9 | 1.1 | 36.0        | 1.5        |
| QY19-8-6      | 1.2 | 6.2  | 0.3 | 2.7 | 4.7  | 168 | 59 | 0.75 | 21.0 | 0.5 | 28.0        | 0.7        |
| QY19-8-7      | 1.1 | 7.6  | 0.3 | 2.9 | 2.5  | 137 | 47 | 0.69 | 19.7 | 0.6 | 28.5        | 0.9        |
| <b>QY19-8</b> |     |      |     |     |      |     |    |      |      |     | <b>31.3</b> | <b>2.9</b> |
| QY19-9-1      | 3.4 | 17.0 | 1.0 | 7.4 | 4.8  | 210 | 65 | 0.77 | 23.9 | 0.4 | 31.2        | 0.5        |
| QY19-9-2      | 3.1 | 15.7 | 0.9 | 6.8 | 4.6  | 242 | 60 | 0.75 | 23.7 | 0.5 | 31.6        | 0.7        |
| QY19-9-3      | 1.7 | 8.5  | 0.5 | 3.7 | 12.4 | 287 | 77 | 0.80 | 23.4 | 0.4 | 29.2        | 0.5        |
| QY19-9-4      | 1.8 | 9.0  | 0.5 | 3.9 | 7.6  | 256 | 65 | 0.77 | 23.7 | 0.5 | 30.9        | 0.7        |
| QY19-9-5      | 1.2 | 5.8  | 0.4 | 2.6 | 15.1 | 290 | 84 | 0.82 | 25.9 | 0.6 | 31.6        | 0.7        |
| QY19-9-6      | 2.0 | 10.4 | 0.5 | 4.4 | 6.0  | 233 | 60 | 0.75 | 21.5 | 0.4 | 28.6        | 0.6        |
| QY19-9-7      | 1.3 | 5.8  | 0.3 | 2.6 | 16.2 | 289 | 86 | 0.82 | 19.5 | 0.4 | 23.6        | 0.0        |
| <b>QY19-9</b> |     |      |     |     |      |     |    |      |      |     | <b>29.5</b> | <b>2.6</b> |
| QY19-10-1     | 3.4 | 15.8 | 0.8 | 7.1 | 2.7  | 154 | 50 | 0.74 | 20.1 | 0.5 | 27.0        | 0.7        |
| QY19-10-2     | 3.8 | 19.6 | 1.0 | 8.3 | 3.3  | 183 | 53 | 0.75 | 21.3 | 0.6 | 28.5        | 0.7        |
| QY19-10-3     | 3.8 | 18.3 | 0.8 | 8.1 | 2.8  | 193 | 52 | 0.72 | 17.3 | 0.5 | 24.2        | 0.6        |

|                         |      |       |      |       |      |     |    |      |      |     |             |            |
|-------------------------|------|-------|------|-------|------|-----|----|------|------|-----|-------------|------------|
| QY19-10-4               | 3.1  | 17.6  | 0.8  | 7.3   | 2.9  | 264 | 47 | 0.68 | 19.8 | 0.9 | 29.0        | 1.3        |
| QY19-10-5               | 2.3  | 11.6  | 0.5  | 5.0   | 2.4  | 166 | 44 | 0.67 | 19.7 | 0.6 | 29.3        | 0.9        |
| QY19-10-6               | 2.0  | 10.6  | 0.5  | 4.5   | 4.6  | 204 | 56 | 0.73 | 20.3 | 0.5 | 27.7        | 0.7        |
| QY19-10-7               | 1.5  | 6.5   | 0.3  | 3.0   | 2.4  | 158 | 45 | 0.68 | 20.2 | 0.6 | 29.7        | 0.8        |
| <b>QY19-10</b>          |      |       |      |       |      |     |    |      |      |     | <b>27.9</b> | <b>1.7</b> |
| QY19-11-1               | 5.2  | 13.4  | 1.0  | 8.4   | 10.7 | 341 | 73 | 0.81 | 21.6 | 0.5 | 26.6        | 0.6        |
| QY19-11-2               | 10.0 | 12.4  | 1.3  | 12.9  | 6.4  | 283 | 66 | 0.78 | 18.7 | 0.5 | 23.9        | 0.7        |
| QY19-11-3               | 5.3  | 13.9  | 0.8  | 8.5   | 8.2  | 270 | 70 | 0.81 | 18.0 | 0.4 | 22.2        | 0.5        |
| QY19-11-4               | 2.9  | 7.8   | 0.5  | 4.7   | 15.1 | 271 | 85 | 0.82 | 20.4 | 0.4 | 24.8        | 0.4        |
| QY19-11-5               | 2.0  | 7.2   | 0.4  | 3.7   | 16.8 | 343 | 83 | 0.82 | 20.9 | 0.3 | 25.5        | 0.4        |
| QY19-11-6               | 2.2  | 7.9   | 0.4  | 4.0   | 14.1 | 258 | 84 | 0.82 | 18.5 | 0.4 | 22.5        | 0.4        |
| <b>QY19-11</b>          |      |       |      |       |      |     |    |      |      |     | <b>24.2</b> | <b>1.6</b> |
| <b>Xingtai Transect</b> |      |       |      |       |      |     |    |      |      |     |             |            |
| XT19-1-1                | 18.6 | 100.5 | 6.1  | 42.2  | 1.8  | 142 | 48 | 0.69 | 26.5 | 0.6 | 38.5        | 0.8        |
| XT19-1-2                | 22.1 | 138.2 | 7.7  | 54.5  | 1.9  | 198 | 43 | 0.66 | 25.9 | 0.9 | 39.6        | 1.4        |
| XT19-1-3                | 17.5 | 47.8  | 4.2  | 28.7  | 1.4  | 152 | 42 | 0.66 | 27.1 | 0.7 | 41.2        | 1.1        |
| XT19-1-4                | 2.9  | 82.8  | 2.9  | 22.3  | 6.6  | 205 | 65 | 0.76 | 24.1 | 0.4 | 31.8        | 0.6        |
| XT19-1-5                | 11.3 | 86.5  | 5.4  | 31.6  | 5.0  | 194 | 58 | 0.74 | 31.2 | 0.5 | 42.0        | 0.7        |
| <b>XT19-1</b>           |      |       |      |       |      |     |    |      |      |     | <b>38.6</b> | <b>3.6</b> |
| XT19-2-1                | 5.1  | 97.3  | 3.4  | 27.9  | 3.8  | 200 | 59 | 0.74 | 22.3 | 0.4 | 30.1        | 0.6        |
| XT19-2-2                | 8.8  | 53.0  | 3.1  | 21.2  | 4.6  | 178 | 57 | 0.74 | 26.8 | 0.5 | 36.2        | 0.7        |
| XT19-2-3                | 4.8  | 18.2  | 1.3  | 9.1   | 5.5  | 198 | 60 | 0.76 | 27.1 | 0.5 | 35.9        | 0.6        |
| XT19-2-4                | 10.0 | 54.4  | 2.1  | 22.8  | 5.0  | 149 | 61 | 0.75 | 16.9 | 0.3 | 22.4        | 0.4        |
| XT19-2-5                | 12.6 | 77.9  | 2.8  | 30.9  | 3.8  | 158 | 55 | 0.73 | 16.8 | 0.3 | 23.1        | 0.4        |
| <b>XT19-2</b>           |      |       |      |       |      |     |    |      |      |     | <b>29.5</b> | <b>6.0</b> |
| XT19-3-1                | 3.9  | 865.2 | 20.4 | 206.8 | 3.5  | 257 | 52 | 0.69 | 18.1 | 0.7 | 26.1        | 1.0        |
| XT19-3-2                | 1.8  | 941.4 | 24.5 | 222.5 | 3.4  | 242 | 52 | 0.70 | 20.2 | 0.8 | 29.0        | 1.1        |
| XT19-3-3                | 1.7  | 596.0 | 15.0 | 141.5 | 2.6  | 213 | 49 | 0.68 | 19.4 | 0.3 | 28.6        | 0.5        |
| XT19-3-4                | 1.7  | 485.9 | 11.4 | 115.7 | 4.4  | 209 | 54 | 0.71 | 18.1 | 0.3 | 25.3        | 0.5        |
| XT19-3-5                | 1.0  | 378.8 | 7.9  | 89.8  | 3.9  | 198 | 52 | 0.70 | 16.1 | 0.3 | 23.0        | 0.4        |
| XT19-3-6                | 1.1  | 398.0 | 10.5 | 94.4  | 4.9  | 209 | 57 | 0.73 | 20.4 | 0.4 | 28.2        | 0.5        |
| XT19-3-7                | 0.9  | 345.1 | 8.1  | 81.8  | 7.4  | 233 | 66 | 0.76 | 18.2 | 0.4 | 23.9        | 0.5        |

|                           |       |       |      |       |      |     |     |      |      |     |             |            |
|---------------------------|-------|-------|------|-------|------|-----|-----|------|------|-----|-------------|------------|
| XT19-3-8                  | 1.4   | 395.8 | 9.2  | 94.2  | 6.8  | 231 | 63  | 0.75 | 18.0 | 0.3 | 23.9        | 0.4        |
| XT19-3-9                  | 1.4   | 597.2 | 14.8 | 141.4 | 3.9  | 206 | 52  | 0.70 | 19.1 | 0.3 | 27.3        | 0.5        |
| <b>XT19-3</b>             |       |       |      |       |      |     |     |      |      |     | <b>26.1</b> | <b>2.1</b> |
| XT19-5-1                  | 16.0  | 1.2   | 4.7  | 16.3  | 12.1 | 230 | 80  | 0.82 | 52.6 | 1.1 | 63.8        | 1.3        |
| XT19-5-2                  | 18.4  | 0.9   | 5.1  | 18.6  | 13.5 | 291 | 80  | 0.82 | 50.3 | 1.1 | 61.2        | 1.3        |
| XT19-5-3                  | 11.6  | 1.1   | 3.1  | 11.9  | 11.6 | 266 | 77  | 0.81 | 48.0 | 1.1 | 58.9        | 1.3        |
| XT19-5-4                  | 17.9  | 1.3   | 4.7  | 18.2  | 11.5 | 228 | 79  | 0.82 | 47.0 | 1.0 | 57.3        | 1.2        |
| XT19-5-5                  | 18.1  | 0.9   | 4.9  | 18.3  | 19.7 | 299 | 93  | 0.85 | 49.5 | 1.0 | 58.5        | 1.2        |
| <b>XT19-5<sup>#</sup></b> |       |       |      |       |      |     |     |      |      |     | <b>59.9</b> | <b>2.3</b> |
| XT19-6-1                  | 51.2  | 12.0  | 10.8 | 54.0  | 18.4 | 371 | 90  | 0.86 | 36.8 | 0.7 | 42.9        | 0.8        |
| XT19-6-2                  | 33.2  | 11.7  | 7.6  | 35.9  | 7.0  | 278 | 69  | 0.80 | 39.3 | 0.8 | 49.3        | 1.0        |
| XT19-6-3                  | 23.3  | 10.6  | 5.7  | 25.8  | 22.3 | 344 | 94  | 0.85 | 40.9 | 0.8 | 48.1        | 0.9        |
| XT19-6-4                  | 30.7  | 2.7   | 6.2  | 31.4  | 11.1 | 323 | 71  | 0.81 | 36.6 | 0.8 | 45.3        | 1.0        |
| XT19-6-5                  | 20.0  | 7.4   | 4.7  | 21.7  | 36.6 | 491 | 120 | 0.88 | 40.4 | 0.7 | 45.8        | 0.8        |
| <b>XT19-6<sup>#</sup></b> |       |       |      |       |      |     |     |      |      |     | <b>46.3</b> | <b>2.2</b> |
| XT19-7-1                  | 9.5   | 1.1   | 1.3  | 9.8   | 6.9  | 237 | 67  | 0.80 | 24.5 | 0.6 | 30.6        | 0.8        |
| XT19-7-2**                | 14.4  | 1.6   | 3.4  | 14.7  | 6.3  | 205 | 63  | 0.78 | 41.9 | 0.9 | 53.8        | 1.2        |
| XT19-7-3**                | 5.2   | 0.4   | 1.2  | 5.3   | 30.1 | 284 | 110 | 0.87 | 42.1 | 1.0 | 48.4        | 1.2        |
| <b>XT19-7</b>             |       |       |      |       |      |     |     |      |      |     | <b>30.6</b> | <b>0.8</b> |
| XT19-8-1**                | 2.5   | 1.6   | 0.5  | 2.9   | 12.5 | 266 | 79  | 0.82 | 33.6 | 0.9 | 40.8        | 1.1        |
| XT19-8-2                  | 2.8   | 1.8   | 0.4  | 3.2   | 13.5 | 329 | 88  | 0.84 | 21.5 | 0.7 | 25.6        | 0.9        |
| XT19-8-3**                | 3.1   | 2.5   | 0.7  | 3.7   | 10.0 | 295 | 80  | 0.82 | 32.4 | 0.9 | 39.3        | 1.0        |
| XT19-8-4**                | 2.9   | 2.6   | 0.6  | 3.5   | 6.1  | 249 | 68  | 0.79 | 32.2 | 1.5 | 40.7        | 1.9        |
| XT19-8-5**                | 3.7   | 1.3   | 0.7  | 4.0   | 26.9 | 268 | 106 | 0.86 | 32.0 | 0.7 | 37.0        | 0.8        |
| <b>XT19-8</b>             |       |       |      |       |      |     |     |      |      |     | <b>25.6</b> | <b>0.9</b> |
| XT19-9-1                  | 8.4   | 10.5  | 2.3  | 10.8  | 21.7 | 280 | 98  | 0.85 | 39.3 | 0.7 | 46.3        | 0.9        |
| XT19-9-2                  | 13.9  | 47.7  | 5.7  | 25.1  | 27.1 | 275 | 106 | 0.86 | 41.8 | 1.1 | 48.7        | 1.3        |
| <b>XT19-9<sup>#</sup></b> |       |       |      |       |      |     |     |      |      |     | <b>47.5</b> | <b>1.2</b> |
| XT19-10-1                 | 99.3  | 40.5  | 23.1 | 108.8 | 6.5  | 210 | 64  | 0.78 | 39.0 | 0.8 | 50.1        | 1.0        |
| XT19-10-2                 | 84.8  | 27.9  | 22.0 | 91.3  | 10.0 | 226 | 75  | 0.81 | 44.3 | 0.9 | 54.7        | 1.1        |
| XT19-10-3                 | 197.7 | 72.9  | 50.5 | 214.8 | 9.6  | 212 | 74  | 0.81 | 43.2 | 0.8 | 53.4        | 1.0        |
| XT19-10-4                 | 157.6 | 35.3  | 42.7 | 165.8 | 16.3 | 297 | 86  | 0.83 | 47.3 | 0.9 | 56.8        | 1.1        |



|                            |       |      |      |       |     |     |    |      |      |     |             |            |
|----------------------------|-------|------|------|-------|-----|-----|----|------|------|-----|-------------|------------|
| XT19-10-5                  | 107.0 | 17.4 | 23.0 | 111.1 | 9.8 | 198 | 76 | 0.81 | 38.0 | 0.7 | 46.8        | 0.9        |
| <b>XT19-10<sup>#</sup></b> |       |      |      |       |     |     |    |      |      |     | <b>52.4</b> | <b>3.5</b> |
| XT19-12-1                  | 0.9   | 8.6  | 0.4  | 2.9   | 9.9 | 220 | 75 | 0.79 | 26.8 | 0.5 | 33.7        | 0.7        |
| XT19-12-2                  | 0.8   | 5.0  | 0.3  | 1.9   | 9.3 | 209 | 74 | 0.79 | 24.5 | 0.6 | 30.9        | 0.8        |
| XT19-12-3                  | 1.7   | 9.2  | 0.3  | 3.9   | 3.8 | 158 | 55 | 0.73 | 15.4 | 0.6 | 21.2        | 0.8        |
| XT19-12-4                  | 1.8   | 16.9 | 0.6  | 5.8   | 4.1 | 152 | 57 | 0.73 | 18.3 | 0.3 | 24.9        | 0.5        |
| XT19-12-5                  | 1.1   | 9.4  | 0.3  | 3.3   | 6.0 | 183 | 64 | 0.76 | 17.0 | 0.4 | 22.2        | 0.5        |
| <b>XT19-12</b>             |       |      |      |       |     |     |    |      |      |     | <b>26.6</b> | <b>4.9</b> |

---

\*Ft is alpha-correction after ref.XX (Farly, 1996).

##Uncertainties of the mean ages are reported as an average standard deviation for each sample.

\*\*Anomalously old age excluded from calculation of mean age and standard deviation.

#Anomalously old mean Ahe age excluded from interpretation on cooling/exhumation history and thermal history modeling.

**Table S3 Apatite fission track data from the Quyang and Xingtai transects**

| Sample                         | Nc | ps ( $\times 10^5 \text{ cm}^{-2}$ )<br>(Ns) | U<br>(ppm) | P( $\chi^2$ )<br>% | ML $\pm 1\sigma$ ( $\mu\text{m}$ )<br>(Nj) | Standard<br>deviation | D <sub>par</sub><br>( $\mu\text{m}$ ) | Age<br>(Ma) | err<br>( $1\sigma$ ) |
|--------------------------------|----|----------------------------------------------|------------|--------------------|--------------------------------------------|-----------------------|---------------------------------------|-------------|----------------------|
| <b><i>Quyang transect</i></b>  |    |                                              |            |                    |                                            |                       |                                       |             |                      |
| QY19-1                         | 28 | 5.57<br>(1165)                               | 14.89      | 40                 | 12.58 $\pm$ 0.20<br>(51)                   | 1.46                  | 1.77                                  | 76.4        | 2.6                  |
| QY19-2                         | 31 | 3.15<br>(880)                                | 14.17      | 14                 | 13.29 $\pm$ 0.27<br>(31)                   | 1.48                  | 1.65                                  | 49.6        | 2.1                  |
| QY19-3                         | 23 | 1.18<br>(313)                                | 5.03       | 63                 | 12.80 $\pm$ 0.30<br>(49)                   | 2.15                  | 1.79                                  | 47.1        | 3.1                  |
| QY19-4                         | 24 | 1.78<br>(283)                                | 7.31       | 21                 | 12.90 $\pm$ 0.76<br>(5)                    | 1.69                  | 1.74                                  | 59.9        | 4.4                  |
| QY19-5                         | 30 | 2.37<br>(850)                                | 11.42      | 23                 | 12.91 $\pm$ 0.17<br>(103)                  | 1.77                  | 1.81                                  | 40.7        | 1.6                  |
| QY19-6                         | 32 | 0.95<br>(328)                                | 2.11       | 98                 | 13.65 $\pm$ 0.48<br>(6)                    | 1.17                  | 1.81                                  | 89.0        | 4.9                  |
| QY19-7                         | 25 | 0.85<br>(188)                                | 2.18       | 100                | 12.23 $\pm$ 1.20<br>(3)                    | 2.07                  | 2.06                                  | 76.0        | 5.6                  |
| QY19-8                         | 31 | 0.91<br>(222)                                | 2.11       | 94                 | 13.33 $\pm$ 0.55<br>(11)                   | 1.82                  | 2.00                                  | 87.1        | 5.9                  |
| QY19-9                         | 33 | 0.86<br>(256)                                | 2.46       | 92                 | 14.13 $\pm$ 0.44<br>(16)                   | 1.74                  | 2.19                                  | 69.9        | 4.4                  |
| QY19-10                        | 24 | 0.9<br>(121)                                 | 3.36       | 100                | 13.43 $\pm$ 0.50<br>(12)                   | 1.72                  | 2.27                                  | 56.6        | 5.2                  |
| QY19-11                        | 33 | 0.80<br>(258)                                | 3.42       | 94                 | 12.49 $\pm$ 0.48<br>(19)                   | 2.08                  | 1.84                                  | 46.8        | 2.9                  |
| <b><i>Xingtai transect</i></b> |    |                                              |            |                    |                                            |                       |                                       |             |                      |
| XT19-1                         | 29 | 5.07<br>(955)                                | 24.16      | 99                 | 13.15 $\pm$ 0.19<br>(71)                   | 1.63                  | 1.79                                  | 44.4        | 1.6                  |
| XT19-2                         | 27 | 4.00<br>(1168)                               | 23.32      | 45                 | 13.10 $\pm$ 0.14<br>(112)                  | 1.44                  | 1.75                                  | 41.3        | 1.4                  |
| XT19-3                         | 25 | 4.19<br>(396)                                | 24.62      | 99                 | 13.39 $\pm$ 0.20<br>(43)                   | 1.29                  | 1.71                                  | 32.6        | 1.7                  |
| XT19-5                         | 23 | 4.30<br>(392)                                | 21.33      | 93                 | 12.89 $\pm$ 0.34<br>(14)                   | 1.27                  | 1.91                                  | 34.2        | 1.8                  |
| XT19-6                         | 23 | 5.55<br>(1377)                               | 37.35      | 75                 | 13.24 $\pm$ 0.12<br>(115)                  | 1.26                  | 1.73                                  | 28.4        | 0.8                  |
| XT19-7                         | 23 | 1.36<br>(200)                                | 8.30       | 100                | 12.94 $\pm$ 0.50<br>(15)                   | 2.02                  | 1.63                                  | 33.9        | 2.4                  |
| XT19-9                         | 22 | 3.45<br>(852)                                | 25.81      | 89                 | 13.28 $\pm$ 0.14<br>(106)                  | 1.44                  | 1.60                                  | 25.9        | 0.9                  |
| XT19-10                        | 24 | 14.4<br>(1641)                               | 101.79     | 40                 | 13.20 $\pm$ 0.12<br>(151)                  | 1.47                  | 1.83                                  | 28.2        | 0.8                  |

Note: Nc, number of dated apatite crystals per sample; ps, spontaneous track density; Ns, number of fission tracks counted; U, uranium concentration measured using LA-ICP-MS; P( $\chi^2$ ), chi-squared probability for (n-1) degrees of freedom; ML, mean confined fission track length; Nj, number of confined fission-track lengths measured; D<sub>par</sub>, arithmetic mean fission-track etch figure diameter parallel to the crystallographic c-axis; Age, reported as central ages calculated using Radial Plotter program with  $1\sigma$  error.
